# Supplementary material for: Administration of bovine casein-derived peptide prevents cognitive decline in Alzheimer disease model mice
Source: PubMed Central journal article supplement (PMC5291428; doi:10.1371/journal.pone.0171515), 2017-02-03
Supplement: pone.0171515.s005.pdf [file pone.0171515.s005.pdf]

# Supporting Method

1

2

## 3 **Blood Pressure Measurement**

4 We used a noninvasive computerized tail-cuff system to measure blood pressure in  
5 conscious mice during reagent administration (BP-98A-L, Softron Co., Ltd., Tokyo,  
6 Japan), as described in a previous report [1]. The system was designed to perform all  
7 functions automatically, including a programmable routine of cuff inflation and  
8 deflation, analysis and assignment of pulse rate and blood pressure, and recording of  
9 data electronically. Mice were held in a small mouse pocket on a warming pad  
10 thermostatically controlled at 37 °C. Mean systolic blood pressure of fifteen  
11 measurements in each group was determined.

## 12 **Reference**

- 13 1. Krege JH, Hodgin JB, Hagaman JR, Smithies O (1995) A noninvasive computerized  
14 tail-cuff system for measuring blood pressure in mice. Hypertension 25: 1111-1115.
